# Supplementary material for: Biological System Responses of Dairy Cows to Aflatoxin B1 Exposure Revealed with Metabolomic Changes in Multiple Biofluids
Source: MDPI journal article supplement (doi:10.3390/toxins11020077), 2019-02-01
Supplement: s1 [file s1]

# Supplementary Materials: Biological System Responses of Dairy Cows to Aflatoxin B1 Exposure Revealed with Metabolomic Changes in Multiple Biofluids

Qian Wang, Yangdong Zhang, Nan Zheng, Liya Guo, Xiaoming Song, Shengguo Zhao and Jiaqi Wang

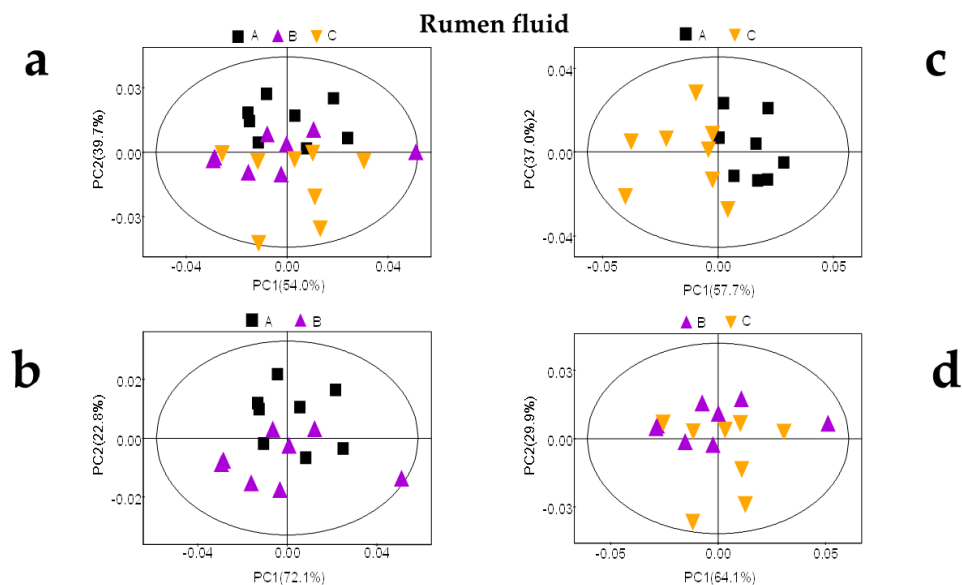

**Figure S1.** PCA analysis based on  $^1\text{H}$  NMR spectra of *rumen fluid* obtained from different groups. (a) PCA profiles among A, B and C; (b) PCA profiles between A and B; (c) PCA profiles between A and C; (d) PCA profiles between B and C. Each point on the score chart represents a sample. Control (A): black squares; AFB20 group (B): purple triangles; AFB40 group (C): yellow triangles.

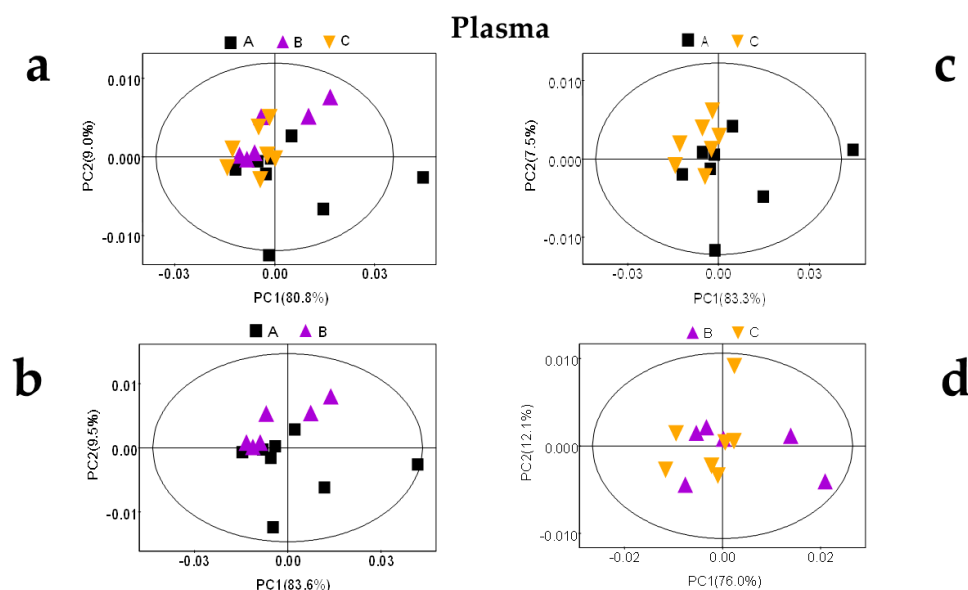

**Figure S2.** PCA analysis based on  $^1\text{H}$  NMR spectra of *plasma* obtained from different groups. (a) PCA profiles among A, B and C; (b) PCA profiles between A and B; (c) PCA profiles between A and C; (d) PCA profiles

between B and C. Each point on the score chart represents a sample. Control (A): black squares; AFB20 group (B): purple triangles; AFB40 group (C): yellow triangles.

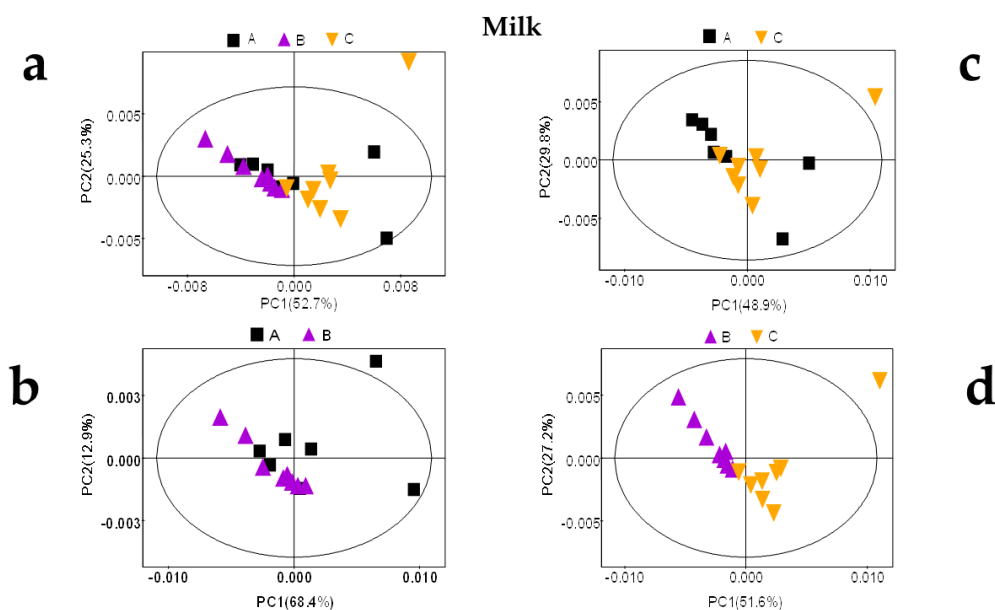

**Figure S3.** PCA analysis based on  $^1\text{H}$  NMR spectra of *milk* obtained from different groups. (a) PCA profiles among A, B and C; (b) PCA profiles between A and B; (c) PCA profiles between A and C; (d) PCA profiles between B and C. Each point of the score chart represents a sample. Control (A): black squares; AFB20 group (B): purple triangles; AFB40 group (C): yellow triangles.

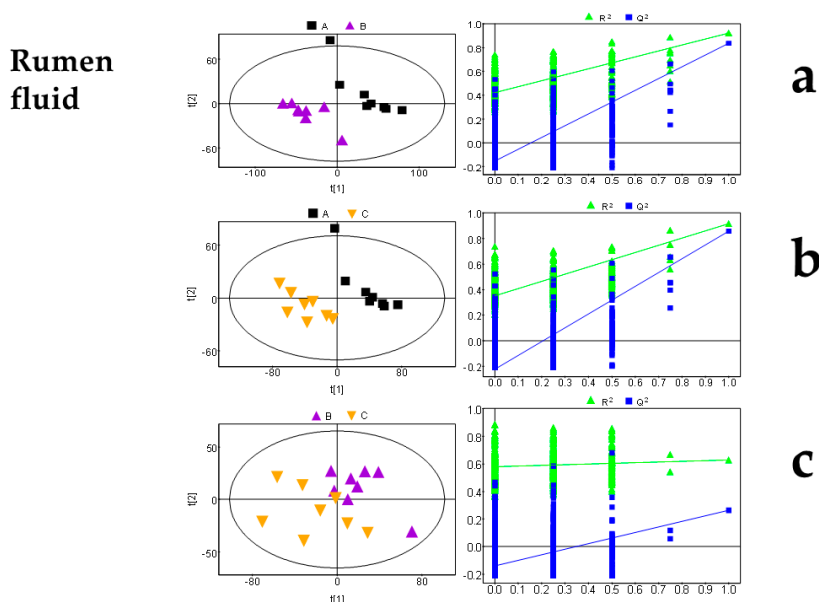

**Figure S4.** PLS-DA scores plots based on  $^1\text{H}$  NMR spectra of *rumen fluid* obtained from different groups. (a) PLS-DA profiles between A and B [ $R^2X = 72.9\%$ ,  $R^2Y = 0.923$ ,  $Q^2 = 0.836$ ; intercept:  $R^2 = (0.0, 0.43)$ ,  $Q^2 = (0.0, -0.015)$ ]; (b) PLS-DA profiles between A and C [ $R^2X = 71\%$ ,  $R^2Y = 0.916$ ,  $Q^2 = 0.858$ ; intercept:  $R^2 = (0.0, 0.359)$ ,  $Q^2 = (0.0, -0.235)$ ]; (c) PLS-DA profiles between B and C [ $R^2X = 57.9\%$ ,  $R^2Y = 0.627$ ,  $Q^2 = 0.262$ ; intercept:  $R^2 = (0.0, 0.591)$ ,  $Q^2 = (0.0, -0.134)$ ]. Each point on the score chart represents a sample. Control (A): black squares; AFB20 group (B): purple triangles; AFB40 group (C): yellow triangles.

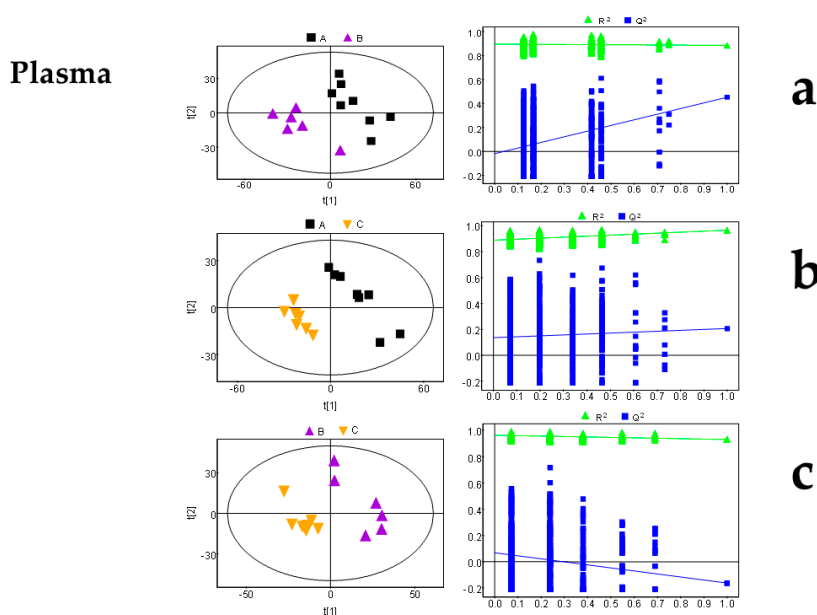

**Figure S5.** PLS-DA scores plots based on <sup>1</sup>H NMR spectra of *plasma* obtained from different groups. (a) PLS-DA profiles between A and B [ $R^2X = 33\%$ ,  $R^2Y = 0.886$ ,  $Q^2 = 0.452$ ; intercept:  $R^2 = (0.0, 0.894)$ ,  $Q^2 = (0.0, -0.0377)$ ]; (b) PLS-DA profiles between A and C [ $R^2X = 24.5\%$ ,  $R^2Y = 0.965$ ,  $Q^2 = 0.205$ ; intercept:  $R^2 = (0.0, 0.895)$ ,  $Q^2 = (0.0, 0.17)$ ]; (c) PLS-DA profiles between B and C [ $R^2X = 23\%$ ,  $R^2Y = 0.931$ ,  $Q^2 = 0.164$ ; intercept:  $R^2 = (0.0, 0.962)$ ,  $Q^2 = (0.0, 0.0559)$ ]. Each point on the score chart represents a sample. Control (A): black squares; AFB20 group (B): purple triangles; AFB40 group (C): yellow triangles.

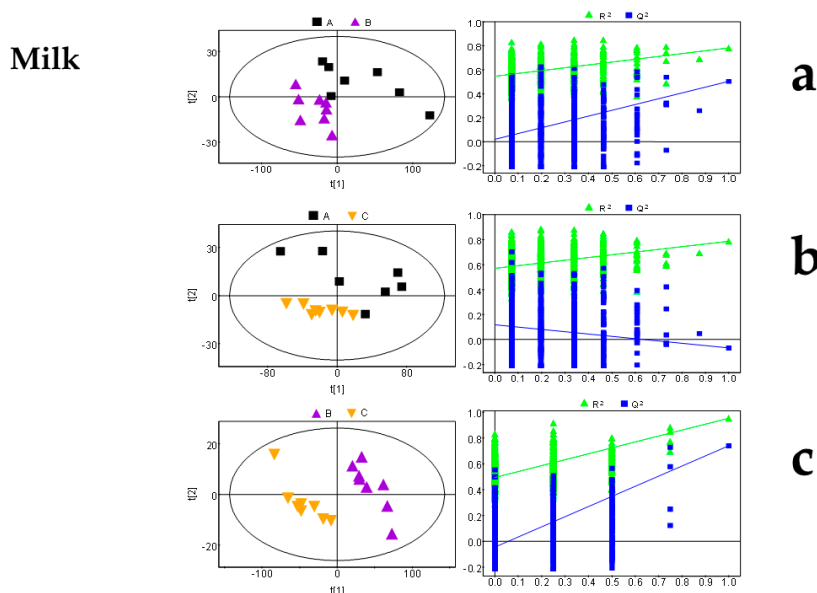

**Figure S6.** PLS-DA scores plots based on <sup>1</sup>H NMR spectra of *milk* obtained from different groups. (a) PLS-DA profiles between A and B [ $R^2X = 70\%$ ,  $R^2Y = 0.781$ ,  $Q^2 = 0.503$ ; intercept:  $R^2 = (0.0, 0.553)$ ,  $Q^2 = (0.0, 0.0165)$ ]; (b) PLS-DA profiles between A and C [ $R^2X = 62.5\%$ ,  $R^2Y = 0.787$ ,  $Q^2 = (0.0, -0.0666)$ ; intercept:  $R^2 = (0.0, 0.587)$ ,  $Q^2 = (0.0, 0.16)$ ]; (c) PLS-DA profiles between B and C [ $R^2X = 65.4\%$ ,  $R^2Y = 0.952$ ,  $Q^2 = 0.738$ ; intercept:  $R^2 = (0.0, 0.506)$ ,  $Q^2 = (0.0, -0.0519)$ ]. Each point on the score chart represents a sample. Control (A): black squares; AFB20 group (B): purple triangles; AFB40 group (C): yellow triangles.

**Table S1.** Ingredients of the total mixed ration <sup>1</sup>.

| Item                                  | Amount (%) |
|---------------------------------------|------------|
| Oat hay                               | 2.24       |
| Corn silage                           | 45.57      |
| Alfalfa hay                           | 8.07       |
| Soybean meal                          | 4.86       |
| DDGS <sup>2</sup>                     | 5.58       |
| Corn meal                             | 11.88      |
| Wheat bran                            | 2.24       |
| Extruded soy flour                    | 0.56       |
| Corn bran shotcrete                   | 4.59       |
| Cottonseed                            | 4.48       |
| Mineral meal                          | 0.22       |
| Diamond XP                            | 0.13       |
| NaHCO <sub>3</sub>                    | 0.54       |
| NaCl                                  | 0.07       |
| Premix                                | 1.12       |
| Water                                 | 7.84       |
| <b>Nutrients, % of DM<sup>3</sup></b> |            |
| Crude protein                         | 17.65      |
| Fat                                   | 4.15       |
| Nonfiber carbohydrate                 | 39.5       |
| Neutral detergent fiber               | 29.49      |
| Calcium                               | 0.8        |
| Phosphorus                            | 0.48       |
| Ash                                   | 9.27       |
| <b>Energy (mcal/Kg)</b>               |            |
| Metabolic energy                      | 2.88       |
| Net Energy                            | 1.67       |

Notes: <sup>1</sup> Control group (AFB1 null); AFB20 group (20µg/kg in the total mixed ration); and AFB40 group (40µg/kg in the total mixed ration). <sup>2</sup> Dried distillers' grains with soluble. <sup>3</sup> Dry matter.

**Table S2.** Rumen fluid metabolites that differed significantly between groups and their correlation coefficients.

| Metabolites <sup>b</sup>                                                                  | <sup>a</sup> r |         |         |
|-------------------------------------------------------------------------------------------|----------------|---------|---------|
|                                                                                           | A vs. B        | A vs. C | B vs. C |
| Val (valine): 0.98 (d), 1.02 (d)                                                          | 0.870          | 0.897   | -       |
| Leu (leucine): 0.96 (d), 0.97 (d)                                                         | 0.888          | 0.911   | -       |
| Ile (isoleucine): 0.94 (t); 1.00 (d)                                                      | 0.808          | 0.957   | -       |
| Butyrate: 0.90 (t), 1.56 (m)                                                              | -              | -0.681  | -0.792  |
| Ethanol: 1.18 (t)                                                                         | -              | 0.748   | 0.743   |
| Lac (lactate): 1.32 (d); 4.11 (q)                                                         | 0.707          | 0.679   | 0.785   |
| Ala (alanine): 1.48 (d)                                                                   | 0.862          | 0.893   | -       |
| TMA (trimethylamine): 2.88 (s)                                                            | 0.673          | 0.733   | -       |
| Raffinose: 5.41 (d), 3.56 (m), 3.67 (d), 3.76 (m), 3.82 (m), 3.89 (m), 3.94 (t), 4.21 (d) | -0.843         | -0.794  | -       |
| Succ (succinate): 2.41 (s)                                                                | 0.800          | 0.669   | 0.704   |
| MMA (methylamine): 2.61 (s)                                                               | -0.802         | -0.842  | -       |
| Choline: 3.20 (s)                                                                         | 0.850          | 0.847   | 0.794   |
| Scy (scyllitol): 3.36 (s)                                                                 | 0.902          | 0.817   | 0.702   |
| Gly (glycine): 3.56 (s)                                                                   | 0.925          | 0.878   | 0.870   |
| α-KG (α-ketoglutarate): 2.49 (t), 3.02 (t)                                                | 0.904          | 0.936   | -       |
| Uracil: 5.80 (d), 7.54 (d)                                                                | 0.822          | 0.869   | -       |
| Tyr (Tyrosine): 6.91 (d), 7.18 (d)                                                        | 0.864          | 0.920   | 0.717   |
| Phe (phenylalanine): 7.32 (d), 7.37 (t), 7.42 (dd)                                        | 0.843          | 0.908   | 0.839   |
| Hypoxanthine: 8.22 (s), 8.20 (s)                                                          | 0.885          | 0.850   | -       |

<sup>a</sup> Correlation coefficients: positive and negative signs indicate positive and negative correlations between concentrations, respectively. Correlation coefficient  $|r| > 0.666$  was used as the cutoff value for statistical significance based on the discrimination significance at the level of  $p = 0.05$  and  $df$  (degree of freedom) = 7. “-” means the correlation coefficient  $|r| < 0.666$ . <sup>b</sup> Multiplicity: s, singlet; d, doublet; t, triplet; q, quartet; dd, doublet of doublets; m, multiplet; br, broad resonance.

**Table S3.** Plasma metabolites that differed significantly between groups and their correlation coefficients.

| Metabolites <sup>b</sup>                                                 | <sup>a</sup> r |         |         |
|--------------------------------------------------------------------------|----------------|---------|---------|
|                                                                          | A vs. B        | A vs. C | B vs. C |
| Val (Valine): 0.98 (d), 1.04 (d)                                         | -0.859         | -       | 0.775   |
| Leu (Leucine): 0.96 (d), 0.97 (d)                                        | -0.848         | -       | 0.881   |
| Ile (Isoleucine): 0.94 (t); 1.00 (d)                                     | -0.873         | -       | 0.786   |
| Ace (Acetate): 1.91 (s)                                                  | -0.778         | -       | -       |
| Choline: 3.19 (s)                                                        | 0.786          | -       | -       |
| PC/GPC: 3.22 (s)                                                         | 0.759          | 0.734   | -       |
| Gly (Glycine): 3.56 (s)                                                  | 0.773          | -       | -0.776  |
| Phe (Phenylalanine): 7.32 (d), 7.37 (t), 7.42 (dd)                       | -              | -0.708  | -       |
| L1: Lipid, $\text{CH}_3\text{-(CH}_2\text{)}_n\text{-(LDL)}$ : 0.86 (br) | -              | 0.708   | -       |
| L3: Lipid, $\text{CH}_3\text{-(CH}_2\text{)}_n\text{-(LDL)}$ : 1.27 (br) | -              | 0.710   | -       |
| L6: Lipid, $\text{-CH}_2\text{-CH=CH-}$ : 2.01 (br)                      | -              | 0.726   | -       |
| L9: Lipid, $\text{-CH=CH-}$ : 5.27 (br)                                  | -              | 0.732   | -       |

<sup>a</sup> Correlation coefficients: positive and negative signs indicate positive and negative correlations in the concentrations, respectively. Correlation coefficient  $|r| > 0.666$ , 0.707 or 0.755 was used as the cutoff value for statistical significance based on the discrimination significance at the level of  $p = 0.05$  and  $df$  (degree of freedom) = 7, 6, or 5, respectively. “-” means correlation coefficient  $|r| < 0.666$ , 0.707, or 0.755, respectively.

<sup>b</sup> Multiplicity: s, singlet; d, doublet; t, triplet; q, quartet; dd, doublet of doublets; m, multiplet; br, broad resonance.

**Table S4.** Milk metabolites that differed significantly between groups and their correlation coefficients.

| Metabolites <sup>b</sup>                                                       | <sup>a</sup> r |         |         |
|--------------------------------------------------------------------------------|----------------|---------|---------|
|                                                                                | A vs. B        | A vs. C | A vs. B |
| OAG (O-acetyl-glycoprotein): 2.05 (s)                                          | -              | 0.779   | -       |
| Cr (Creatine): 3.03 (s), 3.93 (s)                                              | -              | -       | 0.691   |
| Orotate: 6.20 (s)                                                              | -              | 0.669   | -       |
| Phe (Phenylalanine): 7.27 (d), 7.30 (t), 7.38 (dd)                             | -              | -0.758  | -       |
| L1: Lipid, CH <sub>3</sub> -(CH <sub>2</sub> ) <sub>n</sub> -(LDL): 0.86 (br)  | -              | -0.741  | 0.875   |
| L2: Lipid, CH <sub>3</sub> -(CH <sub>2</sub> ) <sub>n</sub> -(VLDL): 0.88 (br) | -              | -0.766  | 0.895   |
| L5: Lipid, -CH <sub>2</sub> -CH <sub>2</sub> -C = O (VLDL): 1.58 (br)          | -              | -0.689  | 0.902   |
| L6: Lipid, -CH <sub>2</sub> -CH = CH-: 2.01 (br)                               | -              | -0.719  | 0.891   |
| L7: Lipid, -CH <sub>2</sub> -C = O: 2.23 (br)                                  | -              | -0.694  | 0.912   |

<sup>a</sup> Correlation coefficients: positive and negative signs indicate positive and negative correlations in the concentrations, respectively. Correlation coefficient  $|r| > 0.602$  was used as the cutoff value for the statistical significance based on the discrimination significance at the level of  $p = 0.05$  and  $df$  (degree of freedom) = 7. “-” means correlation coefficient  $|r| < 0.666$ . <sup>b</sup> Multiplicity: s, singlet; d, doublet; t, triplet; q, quartet; dd, doublet of doublets; m, multiplet; br, broad resonance.
